# Supplementary material for: Greenland Ice Sheet influence on Last Interglacial climate: global sensitivity studies performed with an atmosphere–ocean general circulation model
Source: Copernicus journal article supplement (doi:10.5194/cp-12-1313-2016), 2016-06-08
Supplement: Supplementary file 1 [file cp-12-1313-2016-supplement.zip]

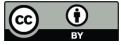

## *Supplement of*

# **Greenland Ice Sheet influence on Last Interglacial climate: global sensitivity studies performed with an atmosphere–ocean general circulation model**

**Madlene Pfeiffer and Gerrit Lohmann**

*Correspondence to:* Madlene Pfeiffer ([madlene.pfeiffer@awi.de](mailto:madlene.pfeiffer@awi.de))

- [cp-12-1313-2016-supplement-title-page.pdf](#)
- [Pfeiffer\\_and\\_Lohmann\\_2016\\_supplement\\_tables\\_text.doc](#)
- [figS01.png](#)
- [figS02.png](#)
- [figS03.png](#)
- [figS04.png](#)
- [figS05.png](#)
- [figS06.png](#)
- [figS07.png](#)
- [figS08.png](#)
- [figS09.png](#)
- [figS10.png](#)
- [figS11.png](#)
- [figS12.png](#)
- [figS13.png](#)
- [figS14.png](#)
- [figS15.png](#)

The copyright of individual parts of the supplement might differ from the CC-BY 3.0 licence.
